# Supplementary material
Source: publisher figshare collection journal article supplement (https://asha.figshare.com/articles/dataset/_/7015223)
Supplement: Supplementary file 1 [file 1]

**Supplemental Material S1.** Syllables, total content units (CUs), syllables/content unity (CU) and left:right CUs for participants with poststroke aphasia (individual data).

| Participant            | Syllables | Total CUs | Syllables/CU | Left:Right CUs |
|------------------------|-----------|-----------|--------------|----------------|
| Case 1 Broca's         | 20**      | 4**       | 5            | 1              |
| Case 2 Broca's         | 39*       | 8**       | 4.9          | 0.33           |
| Case 3 Broca's         | 114       | 13*       | 8.8          | 0.63           |
| Case 4 Broca's         | 26        | 8**       | 3.5*         | 1              |
| Case 5 Broca's         | 28        | 9**       | 3.1*         | 0.14*          |
| Case 6 Global          | 10**      | 0**       | 20++         | N/A            |
| Case 7 Fluent          | 135       | 23        | 5.9          | 0.62           |
| Case 8 Fluent          | 56*       | 5**       | 11.2++       | 4++            |
| Case 9 Unclassifiable  | 43*       | 1**       | 43++         | NA             |
| Case 10 Unclassifiable | 56*       | 2**       | 28++         | 0*             |
| Case 11 Fluent         | 98*       | 9**       | 10.9++       | 3.5++          |
| Case 12 Unclassifiable | 31*       | 2**       | 15.5++       | 1              |
| Case 13 Unclassifiable | 42*       | 4**       | 10.5++       | 3++            |
| Case 14 Fluent         | 83*       | 11*       | 7.5+         | 0.83           |
| Case 15 Fluent         | 130       | 14 *      | 9.3++        | 0.75           |
| Case 16 Broca's        | 41*       | 8**       | 5.1          | 16++           |
| Case 17 Broca's        | 44*       | 6**       | 7.3+         | 12++           |
| Case 18 Broca's        | 24*       | 5**       | 4.8          | 0*             |
| Case 19 Fluent         | 116       | 10**      | 11.6++       | 2.5++          |

*Note.* \* > 1 standard deviation below healthy controls; \*\* > 2 standard deviations below healthy controls.

+ >1 standard deviations above healthy controls; ++ >2 standard deviations above healthy controls.

Syllables, total content units (CUs), syllables/content unity (CU) and left:right CUs for participants with primary progressive aphasia (individual data).

| <b>Participant</b> | <b>Syllables</b> | <b>Total CUs</b> | <b>Syllables/CU</b> | <b>Left:Right CUs</b> |
|--------------------|------------------|------------------|---------------------|-----------------------|
| Case 1 svPPA       | 129              | 12*              | 10.8++              | 2.7++                 |
| Case 2 unPPA       | 172              | 30               | 5.7                 | 0.86                  |
| Case 3 lvPPA       | 206              | 25               | 8.2+                | 0.57                  |
| Case 4 lvPPA       | 329+             | 18*              | 18.3++              | 1.3+                  |
| Case 5 svPPA       | 51*              | 1**              | 51++                | 0*                    |
| Case 6 svPPA       | 65*              | 4**              | 16.3++              | 1                     |
| Case 7 lvPPA       | 89*              | 8**              | 11.1++              | 2++                   |
| Case 8 lvPPA       | 87*              | 9**              | 9.7++               | 1.3+                  |
| Case 9 svPPA       | 188              | 9**              | 20.9++              | 2++                   |
| Case 10 svPPA      | 23*              | 6**              | 3.8*                | 4++                   |
| Case 11 lvPPA      | 224              | 25               | 9++                 | 0.92                  |
| Case 12 nfaPPA     | 40*              | 5**              | 8+                  | 0.67                  |
| Case 13 svPPA      | 54*              | 0**              | 108++               | N/A                   |
| Case 14 lvPPA      | 93*              | 8**              | 11.6++              | 1                     |
| Case 15 nfaPPA     | 56*              | 14*              | 4*                  | 1.9+                  |
| Case 16 svPPA      | 161              | 6**              | 26.8++              | 0                     |
| Case 17 lvPPA      | 153              | 21*              | 7.3+                | 2++                   |
| Case 18 nfaPPA     | 32*              | 8**              | 4*                  | 2++                   |
| Case 19 lvPPA      | 149              | 24               | 6.2                 | 2.7++                 |
| Case 20 nfaPPA     | 160              | 27               | 5.9                 | 1.9++                 |
| Case 21 lvPPA      | 146              | 18*              | 8.1+                | 1.5+                  |
| Case 22 svPPA      | 65*              | 5**              | 13++                | 0.33*                 |
| Case 23 lvPPA      | 82*              | 11*              | 7.5+                | 0.8                   |

---

|               |     |     |        |      |
|---------------|-----|-----|--------|------|
| Case 24 svPPA | 135 | 13* | 10.4++ | 1.5+ |
| Case 25 lvPPA | 133 | 13* | 10.2++ | 0.8  |

---

*Note.* \* > 1 standard deviation below healthy controls; \*\* > 2 standard deviations below healthy controls.

+ > 1 standard deviations above healthy controls; ++ > 2 standard deviations above healthy controls.
