# Supplementary material
Source: publisher figshare collection journal article supplement (https://asha.figshare.com/articles/dataset/_/7015223)
Supplement: Supplementary file 2 [file 1]

**Supplemental Material S3.** Comparison of measures of descriptions of the first update (Figure 1 of main article) and second update (Figure 2 of main article) of the picture by healthy controls.

| <b>Group</b>     | <b>Syllables<br/>Mean (<i>SD</i>)</b> | <b>Total CUs<br/>Mean (<i>SD</i>)</b> | <b>Syllables/CU<br/>Mean (<i>SD</i>)</b> | <b>Left:Right CU<br/>Mean (<i>SD</i>)</b> |
|------------------|---------------------------------------|---------------------------------------|------------------------------------------|-------------------------------------------|
| Picture Update 1 | 197 (87.2)<br>Range: 43–355           | 33.5 (11.4)<br>Range: 12–56           | 5.8 (1.5)<br>Range: 2.9–10               | 0.74 (0.49)<br>Range 0–3.6                |
| Picture Update 2 | 150 (89.1)<br>Range: 43–328           | 27.4 (11.8)<br>Range: 15–56           | 5.2 (1.4)<br>Range: 2.8–7.8              | 0.60 (0.14)<br>Range: 0.3–0.8             |

*Note.* *SD* = standard deviation.
